# Supplementary material for: The effectiveness of hepatitis B vaccine in toddlers based on the five-year period national basic health research (Riskesdas 2007, 2013 and 2018) in Indonesia
Source: PeerJ. 2023 May 15;11:e15199. doi: 10.7717/peerj.15199 (PMC10194077; doi:10.7717/peerj.15199)
Supplement: Supplemental Information 1 [file peerj-11-15199-s001.xlsx]

## Sheet: Sheet1
				Table 1. Distribution of the respondents based on characteristics.
				Percentage (%)
		Characteristic		Riskesdas 2007	Riskesdas 2013	Riskesdas 2018
		Demographic
		Area	Urban	100	50.1	71.6
			Rural		49.9	28.4
		Sex
			Boy (M)	50.3	49.7	50.4
			Girl (F)	49.7	50.3	49.6
		Age (years old)
			1	17.8	14.7	20.4
			2	25.9	22.7	24.4
			3	30.8	26.2	25.8
			4	25.5	36.4	29.4
		Educational level of the mother
			Unfinished Senior high school	10.6	11.6	7.9
			Senior high school	82.8	83.3	84.2
			College	7.3	5.1	8
			Family economy status
			Poor	49.1	34	43.8
			Middle class	38.9	46.7	36.4
			Rich	12	19.3	19.8
			Travel time to immunization services
			< 30 minutes	99.1	94.8	93.6
			≥ 30 minutes	0.9	5.2	6.4
			Toddler Nutritional status
			Undernutrition	15.2	7.6	8.5
			Good nutrition	67.8	80.1	79.7
			Overnutrition	17	12.3	11.8
			Complete hepatitis B immunization status based on the toddler age (years old)
			1	37	69.4	75.2
			2	32.2	65.4	59.7
			3	28.9	56	54
			4	23.7	56.4	44
			2022-04-01	30	60.3	57
			Immune Status to Hepatitis B
		(Anti HBs)
			Positive	10.1	56.1	79.1
			Prevalence of hepatitis B (HBsAg)
			Positive		3.9	9.3
			Have ever been infected with Hepatitis B (Anti-HBc)
			Positive	0.2	7.8	1.3
