# Supplementary material for: The effectiveness of hepatitis B vaccine in toddlers based on the five-year period national basic health research (Riskesdas 2007, 2013 and 2018) in Indonesia
Source: PeerJ. 2023 May 15;11:e15199. doi: 10.7717/peerj.15199 (PMC10194077; doi:10.7717/peerj.15199)
Supplement: Supplemental Information 2 — *Pearson Chi-Square [file peerj-11-15199-s002.xlsx]

## Sheet: Sheet1
Table 2. Relationship between immunization status and mother's education (Riskesdas 2007, Riskesdas 2013, Riskesdas 2018).
		The educational background of toddler’s mother (%)
Survey years	Hepatitis B Immunization Status	Unfinished senior high school	Senior high school	College	P* value
Riskesdas 2007 (urban area)	Completed	15.6	31.3	28	0.000
	Uncompleted	84.4	68.7	72
Riskesdas 2013 (urban & rural areas)	Completed	50	60.5	69.5	0.000
	Uncompleted	50	39.5	30.5
Riskesdas 2018 (urban & rural areas)	Complete	48.3	56.8	70.8	0.000
	Uncompleted	51.7	43.2	29.2
*Pearson Chi-Square
