# Supplementary material for: The effectiveness of hepatitis B vaccine in toddlers based on the five-year period national basic health research (Riskesdas 2007, 2013 and 2018) in Indonesia
Source: PeerJ. 2023 May 15;11:e15199. doi: 10.7717/peerj.15199 (PMC10194077; doi:10.7717/peerj.15199)
Supplement: Supplemental Information 3 — * Continuity Correction [file peerj-11-15199-s003.xlsx]

## Sheet: Sheet1
Table 3. The correlation between hepatitis immunization status and respondent's travel time to immunization service facilities.
The year of Riskesdas implementation	Area	Travel time to health facilities (minutes)	Hepatitis B Immunization Status (%)
			Completed	Uncompleted	P* value	OR	95% CI
Riskesdas 2007	Urban	< 30 min	29.9	70.1	0	0.813	0.75–0.88
		≥ 30 min	34.5	65.5
Riskesdas 2013	Urban and rural areas (national)	< 30 min	61.1	38.9	0	1.883	1.81-1.96
		≥ 30 min	45.5	54.5
	Urban	< 30 min	61.6	38.4	0	2.78	2.56-3.05
		≥ 30 min	36.5	63.5
	Rural	< 30 min	60.5	39.5	0	1.68	1.60-1.75
		≥ 30 min	47.7	52.3
Riskesdas 2018	Urban and rural areas (national)	< 30 min	57.5	42.5	0	1.3	1.27-1.33
		≥ 30 min	51	49
	Urban	< 30 min	57.2	42.8	0	0.61	0.58-0.64
		≥ 30 min	68.7	31.3
	Rural	< 30 min	58.4	41.6	0	1.754	1.70-1.80
		≥ 30 min	44.5	55.5
* Continuity Correction
