# Supplementary material for: The effectiveness of hepatitis B vaccine in toddlers based on the five-year period national basic health research (Riskesdas 2007, 2013 and 2018) in Indonesia
Source: PeerJ. 2023 May 15;11:e15199. doi: 10.7717/peerj.15199 (PMC10194077; doi:10.7717/peerj.15199)
Supplement: Supplemental Information 4 [file peerj-11-15199-s004.xlsx]

## Sheet: Sheet1
Table 4. Effectiveness of hepatitis B immunization (anti-HBs antibody, HBsAg and HBc antibody) based on immunization status in children under five in Riskesdas 2007, 2013 and 2018 data.
			Hepatitis B Immunization Status (%)
The year of Riskesdas implementation	Area	Positive markers	Completed	Uncompleted	P value	OR	95% CI
Riskesdas 2007	Urban	Anti-HBs	11.4	8.5	0	1.39	1.36 – 1.42
		HBcAb	0	0.1	0	1.451	1.45 – 1.46
Riskesdas 2013	Urban	Anti-HBs	59.1	48.8	0	1.516	1.47-1.56
		HBsAg	1	2.7	0	0.356	0.32-0.39
		HBcAb	3.6	2	0	1.806	1.61-2.02
	Rural	Anti-HBs	65.3	46.8	0	2.138	2.08-2.20
		HBsAg	8.9	3.8	0	2.509	2.37 – 2.66
		HBcAb	7.1	17.3	0	0.366	0.35-0.39
Riskesdas 2018	Urban	Anti-HBs	86.4	77.1	0	1.893	1.86-1.93
		HBsAg	7.6	11.1	0	0.669	0.65-0.69
		HBcAb	1.3	0.6	0	2.273	2.08-2.29
	Rural	Anti-HBs	84.9	72.6	0	2.127	2.06-2.19
		HBsAg	9.4	10.9	0	0.851	0.82 – 0.89
		HBcAb	1.4	4.5	0	0.804	0.76-0.85
