# Supplementary material for: The effectiveness of hepatitis B vaccine in toddlers based on the five-year period national basic health research (Riskesdas 2007, 2013 and 2018) in Indonesia
Source: PeerJ. 2023 May 15;11:e15199. doi: 10.7717/peerj.15199 (PMC10194077; doi:10.7717/peerj.15199)
Supplement: Supplemental Information 5 [file peerj-11-15199-s005.xlsx]

## Sheet: Sheet1
Table 5. Relationship between hepatitis B immune status (anti-HBs antibody marker) and nutritional status (Riskesdas 2007, 2013 and 2018).
		The nutritional status of toddlers (%)			P value
Antibody marker	The year of Riskesdas implementation	Undernutrition	Good nutrition	Overnutrition
Anti HBs positif (%)	Riskesdas 2007	8.5	10.4	11	0.000
	Riskesdas 2013	44	56.1	56.3	0.000
	Riskesdas 2018	73.7	79.6	79.6	0.000
